# Supplementary material for: A New Indicator to Differentiate Thyroid Follicular Inclusions in Cervical Lymph Nodes from Patients with Thyroid Cancer
Source: MDPI journal article supplement (doi:10.3390/ijms24010490), 2022-12-28
Supplement: s1 [file s1]

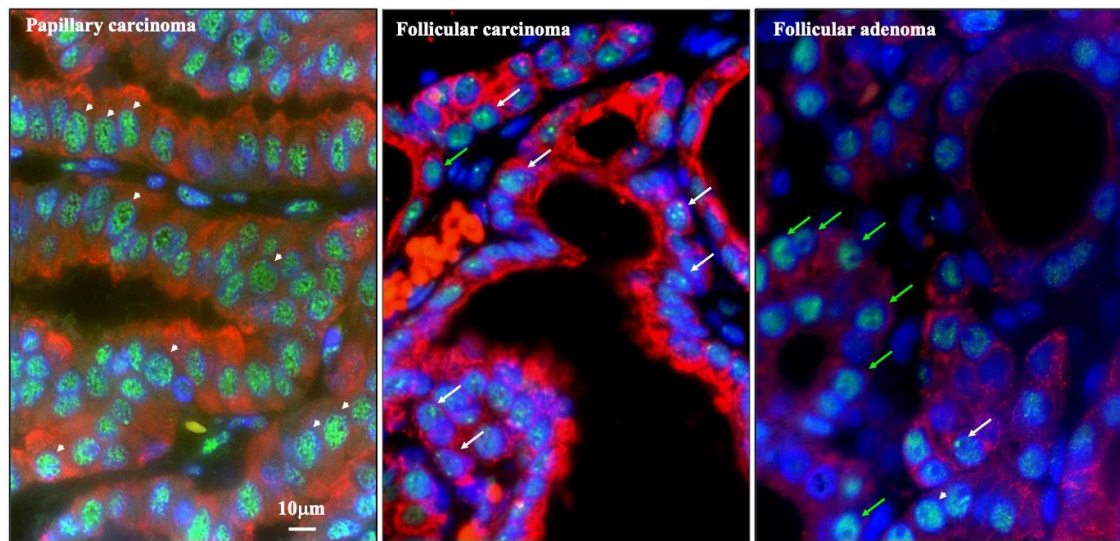

**Figure S1.** Immunofluorescence for 53BP1 expression in Figure 1.

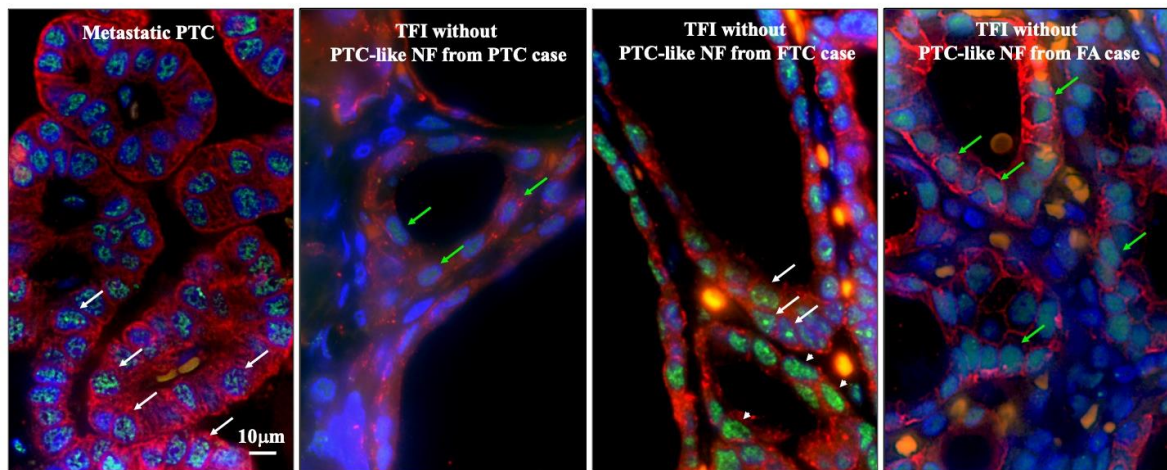

**Figure S2.** Immunofluorescence for 53BP1 expression in Figure 2.
